# Supplementary material for: Synthesis, structure and characterization of three different dimension inorganic–organic hybrid vanadates: [Co2(mIM)5(H2O)2]V4O12, [Ni2(mIM)7(H2O)]V4O12·H2O and [Cd(eIM)2(H2O)]V2O6
Source: Royal Society of Chemistry journal article supplement (doi:10.1039/c4ce02335h), 2014-12-24
Supplement: c4ce02335h1.pdf [file c4ce02335h1.pdf]

## Supplementary Information

### Synthesis, Structure and Characterization of Three Different Dimension Inorganic-Organic Hybrid Vanadates: $[\text{Co}_2(\text{mIM})_5(\text{H}_2\text{O})_2]\text{V}_4\text{O}_{12}$ , $[\text{Ni}_2(\text{mIM})_7(\text{H}_2\text{O})]\text{V}_4\text{O}_{12}\cdot\text{H}_2\text{O}$ and $[\text{Cd}(\text{eIM})_2(\text{H}_2\text{O})]\text{V}_2\text{O}_6$

Shujun Wu,<sup>a,b</sup> Xinhang Yang,<sup>a,b</sup> Jufang Hu,<sup>a</sup> Hongwei Ma,<sup>a</sup> Zhengguo Lin<sup>\*a</sup> and Changwen Hu<sup>\*a</sup>

<sup>a</sup> Key Laboratory of Cluster Science, Ministry of Education of China, School of Chemistry, Beijing Institute of Technology, Beijing 100081, P. R. China.

<sup>b</sup> These authors contributed equally to this work.

**Table S1.** Crystallographic Data for Compound 1-3

**Table S2.** Selected bond distances (Å) of Compound 1-3

**Table S3** Bond valance sum calculations

**Fig. S1** XRPD of Compound 1-3.

**Fig. S2** IR spectra of Compound 1-3

**Fig. S3** XPS spectra of Compound 1-3

**Fig. S4-6** UV/Vis diffuse reflectance spectra of Compound 1-3

**Fig. S5** TGA curve of Compound 1-3.

**Table S1.** Crystallographic Data for Compound 1 -3

| Compounds                                | Compound 1                                                                  | Compound 2                                                                   | Compound 3                                                   |
|------------------------------------------|-----------------------------------------------------------------------------|------------------------------------------------------------------------------|--------------------------------------------------------------|
| Formula                                  | $\text{C}_{20}\text{H}_{34}\text{Co}_2\text{N}_{10}\text{O}_{14}\text{V}_4$ | $\text{C}_{28}\text{H}_{46}\text{Ni}_{14}\text{Ni}_2\text{O}_{14}\text{V}_4$ | $\text{C}_{10}\text{H}_{18}\text{CdN}_4\text{O}_7\text{V}_2$ |
| $M_r$                                    | 960.19                                                                      | 1123.97                                                                      | 520.56                                                       |
| Crystal system                           | Orthorhombic                                                                | Triclinic                                                                    | Monoclinic                                                   |
| Space group                              | $P2_12_12_1$                                                                | $P-1$                                                                        | $P2_1/n$                                                     |
| Temperature(K)                           | 298(2)                                                                      | 298(2)                                                                       | 298(2)                                                       |
| $a$ (Å)                                  | 11.4770(11)                                                                 | 9.4022(8)                                                                    | 9.4328(11)                                                   |
| $b$ (Å)                                  | 17.8350(16)                                                                 | 13.4466(12)                                                                  | 16.3873(17)                                                  |
| $c$ (Å)                                  | 17.8350(16)                                                                 | 17.5161(15)                                                                  | 11.3981(12)                                                  |
| $\alpha$ (deg)                           | 90                                                                          | 89.367(2)                                                                    | 90                                                           |
| $\beta$ (deg)                            | 90                                                                          | 87.3580(10)                                                                  | 99.731                                                       |
| $\gamma$ (deg)                           | 90                                                                          | 87.4490(10)                                                                  | 90                                                           |
| $V$ (Å <sup>3</sup> )                    | 3650.7(6)                                                                   | 2209.9(3)                                                                    | 1736.5(3)                                                    |
| $Z$                                      | 4                                                                           | 2                                                                            | 4                                                            |
| $D_{\text{calc.}}$ (g cm <sup>-3</sup> ) | 1.747                                                                       | 1.689                                                                        | 1.991                                                        |
| $F(000)$                                 | 1928                                                                        | 1144                                                                         | 1024                                                         |
| $R_1[I > 2\sigma(I)]$                    | 0.0843                                                                      | 0.0469                                                                       | 0.0329                                                       |
| $wR_2[I > 2\sigma(I)]$                   | 0.1929                                                                      | 0.0870                                                                       | 0.0603                                                       |
| $R_1(\text{all data})$                   | 0.1628                                                                      | 0.0825                                                                       | 0.0516                                                       |
| $wR_2(\text{all data})$                  | 0.2213                                                                      | 0.0954                                                                       | 0.0692                                                       |
| GOOF                                     | 1.054                                                                       | 1.021                                                                        | 1.065                                                        |

**Table S2.** Selected bond distances (Å) of Compound 1-3

| Compound 1   |           | Compound 2    |          | Compound 3   |          |
|--------------|-----------|---------------|----------|--------------|----------|
| Co(1)-N(2)   | 2.086(12) | Ni(1)-O(2)    | 2.043(3) | Cd(1)-N(4)   | 2.206(4) |
| Co(1)-N(4)   | 2.118(12) | Ni(1)-O(9)    | 2.046(3) | Cd(1)-N(2)   | 2.213(4) |
| Co(1)-O(11)  | 2.122(10) | Ni(1)-N(2)    | 2.060(4) | Cd(1)-O(6)   | 2.331(3) |
| Co(1)-O(13)  | 2.126(9)  | Ni(1)-N(6)    | 2.067(4) | Cd(1)-O(2)   | 2.381(3) |
| Co(1)-N(6)   | 2.145(13) | Ni(1)-N(4)    | 2.073(4) | Cd(1)-O(2)#1 | 2.412(3) |
| Co(1)-O(3)   | 2.155(9)  | Ni(1)-O(13)   | 2.107(3) | Cd(1)-O(7)   | 2.454(3) |
| Co(2)-O(14)  | 1.980(9)  | Ni(2)-O(6)#1  | 2.056(3) | V(1)-O(3)    | 1.615(3) |
| Co(2)-N(10)  | 1.988(13) | Ni(2)-O(6)    | 2.056(3) | V(1)-O(2)    | 1.672(3) |
| Co(2)-N(8)   | 2.051(12) | Ni(2)-N(10)#1 | 2.086(4) | V(1)-O(1)    | 1.791(3) |
| Co(2)-O(2)   | 2.091(9)  | Ni(2)-N(10)   | 2.086(4) | V(1)-O(4)    | 1.792(3) |
| Co(2)-O(8)   | 2.098(9)  | Ni(2)-N(8)#1  | 2.105(4) | V(2)-O(5)    | 1.628(3) |
| V(1)-O(3)    | 1.649(9)  | Ni(2)-N(8)    | 2.105(4) | V(2)-O(6)#1  | 1.644(3) |
| V(1)-O(2)    | 1.684(9)  | Ni(3)-O(11)   | 2.068(3) | V(2)-O(4)#2  | 1.800(3) |
| V(1)-O(4)    | 1.803(9)  | Ni(3)-O(11)#2 | 2.068(3) | V(2)-O(1)    | 1.805(3) |
| V(1)-O(1)    | 1.809(10) | Ni(3)-N(14)   | 2.085(4) |              |          |
| V(2)-O(5)    | 1.594(10) | Ni(3)-N(14)#2 | 2.085(4) |              |          |
| V(2)-O(6)    | 1.659(9)  | Ni(3)-N(12)   | 2.120(4) |              |          |
| V(2)-O(4)#1  | 1.814(9)  | Ni(3)-N(12)#2 | 2.120(4) |              |          |
| V(2)-O(1)    | 1.818(10) | V(1)-O(3)     | 1.623(4) |              |          |
| V(3)-O(9)    | 1.625(10) | V(1)-O(2)     | 1.631(3) |              |          |
| V(3)-O(8)    | 1.661(9)  | V(1)-O(1)     | 1.760(3) |              |          |
| V(3)-O(7)    | 1.784(9)  | V(1)-O(4)#3   | 1.778(3) |              |          |
| V(3)-O(10)   | 1.785(9)  | V(2)-O(7)     | 1.618(4) |              |          |
| V(4)-O(12)   | 1.633(9)  | V(2)-O(6)     | 1.626(3) |              |          |
| V(4)-O(11)   | 1.657(10) | V(2)-O(5)     | 1.776(4) |              |          |
| V(4)-O(7)#2  | 1.831(9)  | V(2)-O(1)     | 1.794(4) |              |          |
| V(4)-O(10)#3 | 1.832(9)  | V(3)-O(10)    | 1.612(3) |              |          |
| O(4)-V(2)#4  | 1.814(9)  | V(3)-O(9)     | 1.640(3) |              |          |
| O(7)-V(4)#5  | 1.831(9)  | V(3)-O(4)     | 1.784(3) |              |          |
| O(10)-V(4)#6 | 1.832(9)  | V(3)-O(8)     | 1.795(3) |              |          |
|              |           | V(4)-O(12)    | 1.618(4) |              |          |
|              |           | V(4)-O(11)    | 1.636(3) |              |          |
|              |           | V(4)-O(5)#4   | 1.775(3) |              |          |
|              |           | V(4)-O(8)     | 1.782(3) |              |          |

Symmetry transformations used to generate equivalent atoms: (1) #1  $x-1/2, -y+1/2, -z+1$ ; #2  $-x+3/2, -y, z+1/2$ ; #3  $-x+2, y+1/2, -z+3/2$ ; #4  $x+1/2, -y+1/2, -z+1$ ; #5  $-x+3/2, -y, z-1/2$ ; #6  $-x+2, y-1/2, -z+3/2$ . (2) #1  $-x, -y+1, -z+1$ ; #2  $-x+2, -y+1, -z$ ; #3  $x-1, y, z$ ; #4  $x+1, y, z$ . (3) #1  $-x+2, -y, -z+1$ ; #2  $-x+1, -y, -z+1$ .

**Table S3** Bond valance sum calculations

|                    | Compound 1 | Compound 2 | Compound 3 |
|--------------------|------------|------------|------------|
| V1 for compound 1  | 4.894      | --         | --         |
| V2 for compound 1  | 5.144      | --         | --         |
| V3 for compound 1  | 5.205      | --         | --         |
| V4 for compound 1  | 4.916      | --         | --         |
| Co1 for compound 1 | 2.339      | --         | --         |
| Co2 for compound 1 | 2.359      | --         | --         |
| V1 for compound 2  | --         | 5.412      | --         |
| V2 for compound 2  | --         | 5.363      | --         |
| V3 for compound 2  | --         | 5.304      | --         |
| V4 for compound 2  | --         | 5.356      | --         |
| Ni1 for compound 2 | --         | 2.265      | --         |
| Ni2 for compound 2 | --         | 2.248      | --         |
| Ni3 for compound 2 | --         | 2.250      | --         |
| V1 for compound 3  | --         | --         | 5.150      |
| V2 for compound 3  | --         | --         | 5.144      |
| Cd1 for compound 3 | --         | --         | 2.089      |

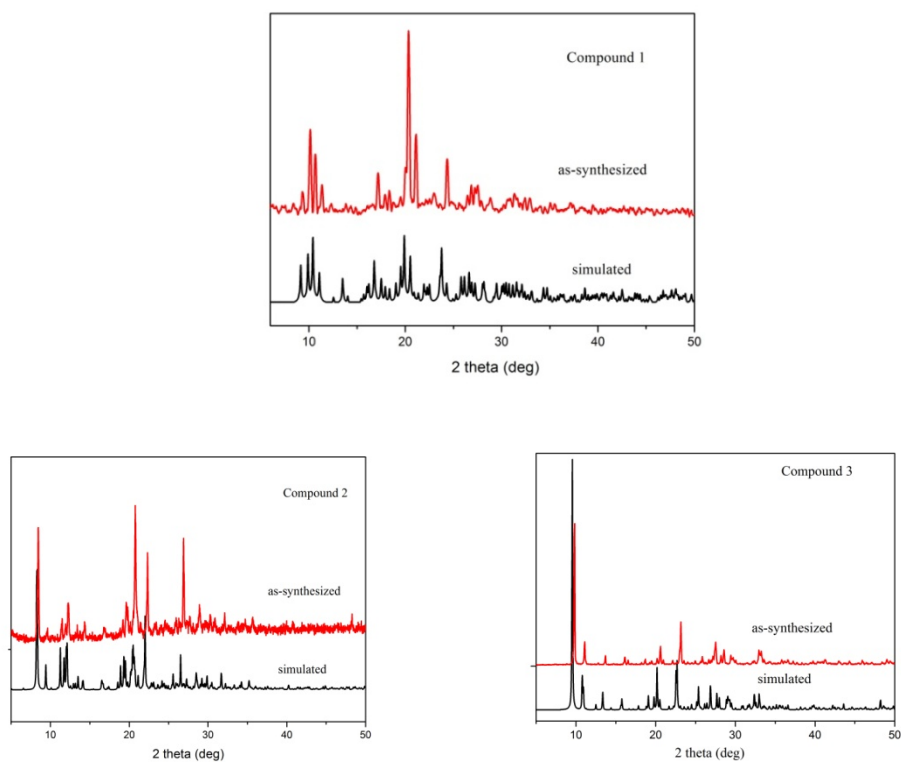

Fig. S1 The simulated (black) and experimental (red) powder XRD pattern of compound 1-3.

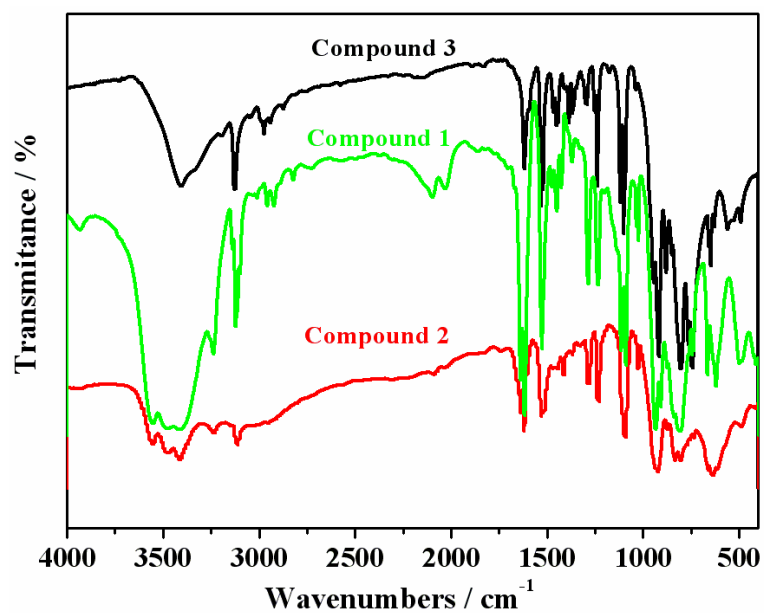

Fig. S2 The IR spectra of 1-3

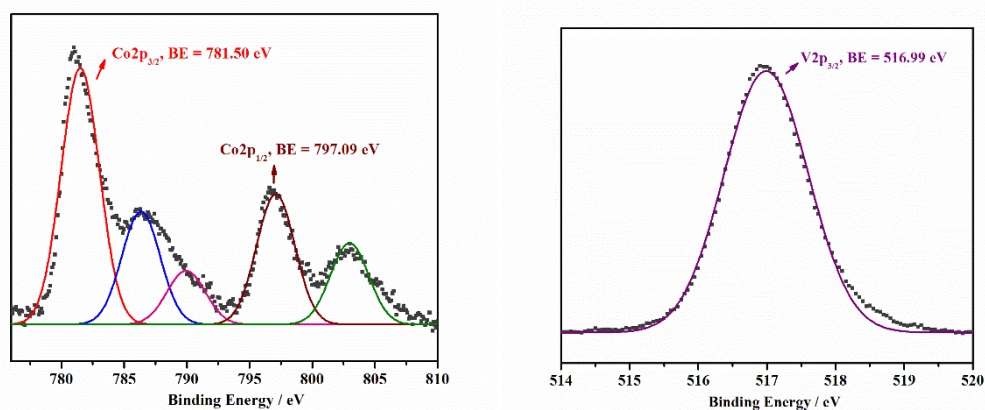

Fig.S3 XPS The XPS spectra for Co and V in 1

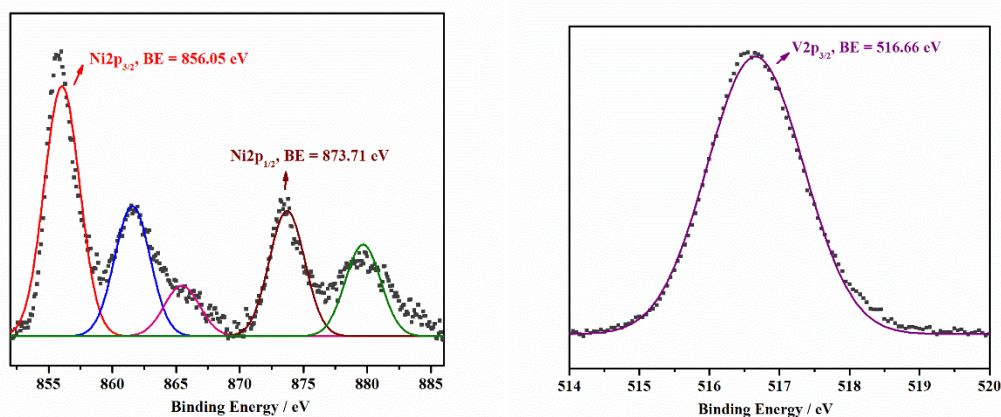

Fig.S4 XPS The XPS spectra for Ni and V in 2

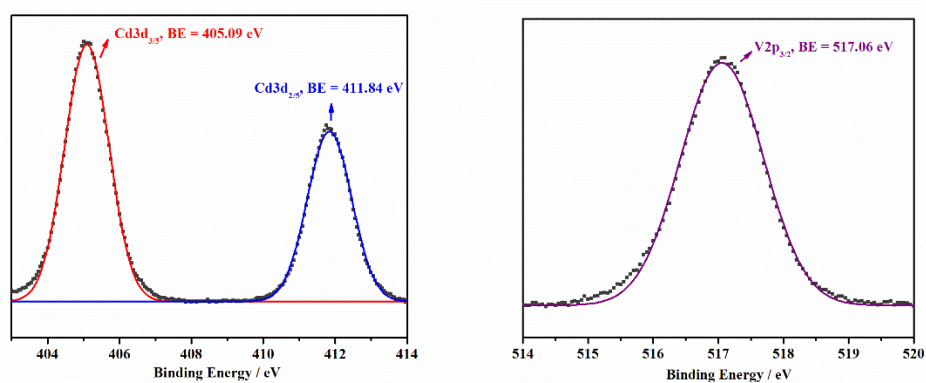

Fig.S5 The XPS spectra for Cd and V in 3

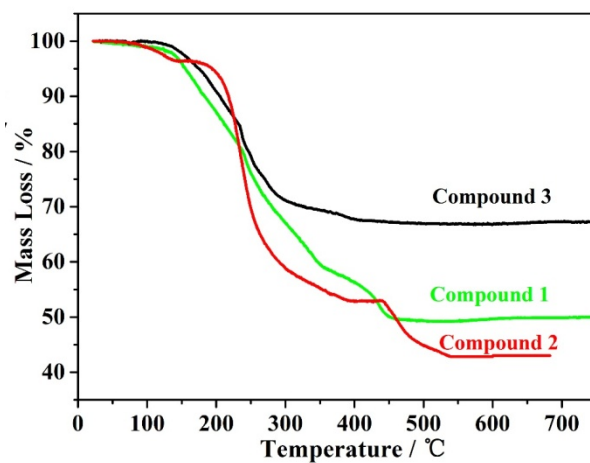

Fig. S6 Thermogravimetric Analysis of compound 1-3

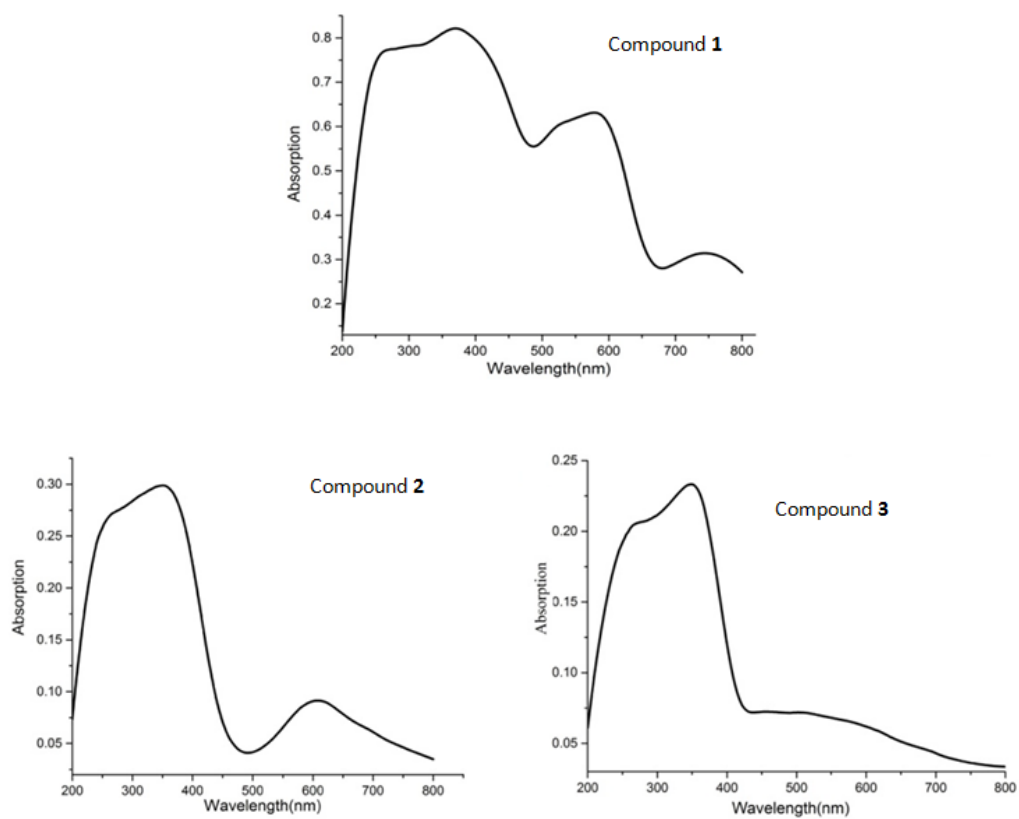

Fig. S7 The UV-vis absorption spectra of Compound 1-3
